# Supplementary material for: The impact of nTiO2 and GO (graphene oxide), and their combinations, on freshwater Chlorella sp.: a comparative study in lake water and BG-11 media
Source: Royal Society of Chemistry journal article supplement (doi:10.1039/d4em00041b), 2024-01-01
Supplement: d4em00041b1.pdf [file d4em00041b1.pdf]

**Supplementary Information**

**The Impact of nTiO<sub>2</sub> and GO (Graphene Oxide), and their  
Combinations, on Freshwater *Chlorella* sp.: A Comparative Study  
in Lake water and BG 11 Media**

**Camil Rex M<sup>a,1</sup>, Abhrajit Debroy<sup>a,1</sup>, Amitava Mukherjee<sup>a\*</sup>**

**<sup>a</sup>Centre for Nanobiotechnology, Vellore Institute of Technology, Vellore, Tamil Nadu,  
632014, India**

**<sup>1</sup>Authors have contributed equally**

**\*Corresponding author**

**Dr. Amitava Mukherjee**

**Senior Professor & Director**

**Centre for Nanobiotechnology**

**Vellore Institute of Technology, Vellore – 632014, India.**

**Email: amit.mookerjea@gmail.com, amitav@vit.ac.in**

**Phone: 91 416 2202620**

**Fax: 91-416-224309**

## 21 **Materials and Methods**

22

### 23 **Methods S1: Synthesis of GO**

24

25 The modified Hummer's method was followed using graphite powder (>99.95% purity). The  
26 sulphuric acid and phosphoric acid were measured in the volume of 27 mL and 3 mL (9:1 ratio)  
27 and stirred continuously for 15 min. 0.225 g of graphite powder was added to the acid mix and  
28 followed by the slow addition of  $\text{KMnO}_4$  (1.32 g). The solution changed to dark green after 6  
29 h of continuous stirring. The removal of excess  $\text{KMnO}_4$  was done by adding 0.675 mL of  $\text{H}_2\text{O}_2$   
30 (dropwise), under continuous stirring for 10 min. The solution was allowed to cool down. At  
31 the end of the reaction, the material was washed with HCl (10 mL) and deionized water (30  
32 mL) using centrifugation at 5000 rpm for 20 min. The obtained pellet was dried in a hot air  
33 oven (for 48 h at 60 °C) to achieve the powder form of GO for further studies <sup>1</sup>.

34

### 35 **Methods S2: Chemicals used**

36

37 Sulphuric acid ( $\text{H}_2\text{SO}_4$ ), phosphoric acid ( $\text{H}_3\text{PO}_4$ ), and hydrochloric acid (HCl) were purchased  
38 from Molychem Pvt. Ltd., India. Potassium permanganate ( $\text{KMnO}_4$ ) was purchased from Sisco  
39 Research Laboratories Pvt. Ltd., India.  $\text{nTiO}_2$  (Aeroxide P25), Graphite powder, 2', 7' -  
40 dichlorofluorescein diacetate (DCFH-DA) were purchased from Sigma Aldrich. DMSO  
41 (Dimethyl sulfoxide), and hydrogen peroxide ( $\text{H}_2\text{O}_2$ ) were purchased from SDFCL (Mumbai).  
42 BG-11, Trichloroacetic acid (TCA), and thiobarbituric acid (TBA) were purchased from Hi-  
43 Media Pvt. Ltd (Mumbai, India).

44

45

### 46 **Methods S3: Characterization**

47

48 Pristine form of nTiO<sub>2</sub>, GO, and their mixtures in both the media *i.e.* BG-11 and lake water  
49 were characterized by Field Emission Scanning Electron Microscope (FESEM) (Thermo  
50 Fisher FEI Quanta 250 FEG). The surface charge was analysed by zeta potential (90 Plus  
51 Particle Size Analyzer, Brookhaven Instruments Corp., USA).

52

### 53 **Methods S4: Growth Inhibition**

54 Equation (I) was followed to evaluate the total growth inhibition and shading effect as well.

55 
$$Growth\ Inhibition\ (\%) = 100 - \left( \frac{Test}{Control} * 100 \right) \quad \dots (I)$$

56

### 57 **Methods S5**

58 The independent action (IA) model was used to examine the influence of nTiO<sub>2</sub>, GO and their  
59 mixture toxicity. Based on the toxicity (%) brought about by pristine nTiO<sub>2</sub> and GO, equation  
60 (II) was utilized to determine the predicted toxicity (C<sub>Exp</sub>) of the mixture.

61 
$$C_{exp} = A + B - \left( \frac{A * B}{100} \right) \quad \dots (II)$$

62 where A and B, respectively, stand for the individual toxicity of GO and nTiO<sub>2</sub>.

63 
$$RI = \frac{C_{obs}}{C_{exp}} \quad \dots (III)$$

64 where C<sub>Obs</sub> stands for the observed toxicity of the mixture of GO and nTiO<sub>2</sub>. Then, using  
65 equation (III), the nature of the interaction between the two nanomaterials were identified using  
66 the inhibition ratio (RI). Despite the obtained R<sub>I</sub> values, the interaction between nTiO<sub>2</sub> and GO

67 was regarded as additive when the toxicity difference between  $C_{Obs}$  and  $C_{Exp}$  were statistically  
68 insignificant at the  $p > 0.05$ .

#### 69 **Methods S6: Oxidative stress**

70 DCFH-DA is a non-fluorescent cell permeable dye. In reaction with ROS, this dye is oxidized  
71 to a highly fluorescent 2',7'-dichlorofluorescein which is detected. After 72 h, 5 ml of algal cell  
72 suspension was incubated with 50  $\mu$ l of DCFH-DA (100 mM) under the dark condition for 30  
73 min. The fluorescence intensity of the samples loaded in 96 well plate (white) was measured  
74 at an excitation and emission wavelength of 485 nm and 530 nm respectively using a  
75 spectrofluorometer. The generated ROS was calculated with reference to algal cells without  
76 treatment <sup>2</sup>.

77 After 72 h of interaction, treated samples were centrifuged at 4 °C for 10 min at 7000 rpm. Cell  
78 pellets were further treated with 0.25% TBA (prepared in a 10% TCA solution) and kept in a  
79 water bath at 95 °C for 30 min. The heated sample mixtures were quickly placed on ice to stop  
80 the reaction and centrifuged at 7000 rpm for 10 min. The supernatant's absorbance containing  
81 the released MDA enzyme was measured at 530 nm. By subtracting the absorbance at 600 nm  
82 (Microplate spectrophotometer, BIO-RAD xMark<sup>TM</sup>) <sup>3</sup>.

#### 83 **Methods S7: Photosynthetic parameters**

84 A photosynthesis yield analyzer (Mini PAM, Heinz Walz, Germany) was used to measure the  
85 photochemical quantum yield of the PS II (Y II) system, and electron transport rate (ETR) in  
86 the treated and control algal cells. After 72 h of interaction, the control and the treated cells  
87 were placed in dark incubation for 30 min followed by addition of 200  $\mu$ l of sample into the  
88 instrument chamber and passing on the high-intensity Actinic light to record the effective  
89 quantum yield of PS II (Y II) and ETR of the samples <sup>4</sup>.

90

91

## 92 **References**

93 1 N. Roy, K. Kannabiran and A. Mukherjee, .

94 2 V. Thiagarajan, P. M., A. S., S. R., C. N., S. G.K. and A. Mukherjee, *Chemosphere*, 2019, **233**,  
95 363–372.

96 3 S. Das, S. Giri, G. Wadhwa, M. Pulimi, S. Anand, N. Chandrasekaran, S. A. Johari, P. K. Rai and  
97 A. Mukherjee, *Environmental Science and Pollution Research*, 2023, 70246–70259.

98 4 A. Debroy, N. Roy, S. Giri, M. Pulimi, N. Chandrasekaran, W. J. G. M. Peijnenburg and A.  
99 Mukherjee, *Environmental Pollution*, 2024, **341**, 123015.

100
